# Supplementary material for: The C228T mutation of TERT promoter frequently occurs in bladder cancer stem cells and contributes to tumorigenesis of bladder cancer
Source: PubMed Central journal article supplement (PMC4637304; doi:10.18632/oncotarget.4295), 2015-06-17
Supplement: oncotarget-06-19542-s001.pdf [file oncotarget-06-19542-s001.pdf]

## SUPPLEMENTARY TABLE LEGENDS

Supplementary Table S1. Characteristics of bladder cancer patients

| Patient No. | Sex | Age | Stage | Grade | Superficial/<br>Invasive | Primary/<br>Relapsed |
|-------------|-----|-----|-------|-------|--------------------------|----------------------|
| 1           | M   | 68  | T3    | 2     | Invasive                 | Primary              |
| 2           | M   | 52  | T2    | 3     | Invasive                 | Relapsed             |
| 3           | M   | 64  | T3    | 2     | Invasive                 | Primary              |
| 4           | M   | 73  | T2    | 3     | Invasive                 | Primary              |
| 5           | M   | 57  | T2    | 2     | Invasive                 | Primary              |
| 6           | M   | 40  | T3    | 2     | Invasive                 | Primary              |
| 7           | M   | 71  | T4    | 2     | Invasive                 | Primary              |
| 8           | M   | 65  | T4    | 1     | Invasive                 | Primary              |
| 9           | M   | 82  | T3    | 3     | Invasive                 | Primary              |
| 10          | M   | 70  | T4    | 3     | Invasive                 | Primary              |
| 11          | M   | 81  | T3    | 3     | Invasive                 | Primary              |
| 12          | M   | 57  | T4    | 2     | Invasive                 | Primary              |
| 13          | M   | 48  | T3    | 2     | Invasive                 | Primary              |
| 14          | F   | 69  | T2    | 1     | Invasive                 | Primary              |
| 15          | M   | 66  | T3    | 2     | Invasive                 | Primary              |
| 16          | F   | 57  | T3    | 3     | Invasive                 | Primary              |
| 17          | M   | 64  | T2    | 3     | Invasive                 | Primary              |
| 18          | M   | 80  | T3    | 2     | Invasive                 | Relapsed             |
| 19          | M   | 56  | T2    | 2     | Invasive                 | Primary              |
| 20          | M   | 83  | T3    | 2     | Invasive                 | Primary              |
| 21          | M   | 62  | T3    | 3     | Invasive                 | Primary              |
| 22          | M   | 60  | T2    | 2     | Invasive                 | Primary              |
| 23          | M   | 57  | T2    | 2     | Invasive                 | Relapsed             |
| 24          | F   | 64  | T2    | 3     | Invasive                 | Primary              |
| 25          | M   | 59  | T3    | 1     | Invasive                 | Primary              |
| 26          | M   | 52  | T3    | 2     | Invasive                 | Primary              |
| 27          | F   | 83  | T3    | 1     | Invasive                 | Primary              |
| 28          | M   | 49  | T2    | 1     | Invasive                 | Primary              |
| 29          | M   | 55  | T3    | 2     | Invasive                 | Primary              |
| 30          | M   | 68  | T3    | 2     | Invasive                 | Primary              |
| 31          | M   | 65  | T3    | 3     | Invasive                 | Relapsed             |
| 32          | M   | 73  | T2    | 2     | Invasive                 | Primary              |

(Continued)

| Patient No. | Sex | Age | Stage | Grade | Superficial/<br>Invasive | Primary/<br>Relapsed |
|-------------|-----|-----|-------|-------|--------------------------|----------------------|
| 33          | M   | 47  | T3    | 2     | Invasive                 | Relapsed             |
| 34          | M   | 83  | T3    | 3     | Invasive                 | Primary              |
| 35          | M   | 78  | T4    | 3     | Invasive                 | Primary              |
| 36          | M   | 65  | T3    | 3     | Invasive                 | Primary              |
| 37          | F   | 53  | T3    | 3     | Invasive                 | Primary              |
| 38          | M   | 82  | T2    | 2     | Invasive                 | Primary              |
| 39          | M   | 65  | T2    | 2     | Invasive                 | Primary              |
| 40          | M   | 66  | T3    | 2     | Invasive                 | Primary              |
| 41          | M   | 53  | T3    | 3     | Invasive                 | Primary              |
| 42          | M   | 57  | T3    | 3     | Invasive                 | Primary              |
| 43          | M   | 64  | T2    | 2     | Invasive                 | Primary              |
| 44          | M   | 75  | T4    | 2     | Invasive                 | Primary              |
| 45          | F   | 76  | T4    | 3     | Invasive                 | Primary              |
| 46          | M   | 69  | T2    | 2     | Invasive                 | Primary              |
| 47          | M   | 56  | T4    | 2     | Invasive                 | Primary              |
| 48          | F   | 73  | T2    | 3     | Invasive                 | Primary              |
| 49          | F   | 73  | T3    | 3     | Invasive                 | Primary              |
| 50          | M   | 65  | T2    | 3     | Invasive                 | Primary              |
| 51          | M   | 58  | T2    | 2     | Invasive                 | Primary              |
| 52          | M   | 79  | T4    | 2     | Invasive                 | Primary              |
| 53          | F   | 80  | T3    | 2     | Invasive                 | Primary              |
| 54          | M   | 57  | T4    | 3     | Invasive                 | Primary              |
| 55          | M   | 66  | T3    | 2     | Invasive                 | Primary              |
| 56          | M   | 54  | T2    | 2     | Invasive                 | Primary              |
| 57          | M   | 56  | T2    | 2     | Invasive                 | Primary              |
| 58          | M   | 60  | T2    | 3     | Invasive                 | Primary              |
| 59          | M   | 78  | T4    | 3     | Invasive                 | Relapsed             |
| 60          | M   | 65  | T4    | 3     | Invasive                 | Relapsed             |

**Supplementary Table S2. TERT promoter mutations in subpopulation cell types of bladder cancer patients**

| Patient No. | BCSCs |       | non-BCSCs |       | NBBCs |       | non-NBBCs |       |
|-------------|-------|-------|-----------|-------|-------|-------|-----------|-------|
|             | C228T | C228C | C228T     | C228C | C228T | C228C | C228T     | C228C |
| 1           | 13    | 7     | 9         | 11    | 0     | 20    | 0         | 20    |
| 2           | 17    | 3     | 12        | 8     | 0     | 20    | 0         | 20    |
| 3           | 14    | 6     | 7         | 13    | 0     | 20    | 0         | 20    |
| 4           | 16    | 4     | 10        | 10    | 0     | 20    | 0         | 20    |
| 5           | 14    | 6     | 5         | 15    | 0     | 20    | 0         | 20    |
| 6           | 17    | 3     | 12        | 8     | 0     | 20    | 0         | 20    |
| 7           | 15    | 5     | 6         | 14    | 0     | 20    | 0         | 20    |
| 8           | 11    | 9     | 3         | 17    | 0     | 20    | 0         | 20    |
| 9           | 16    | 4     | 12        | 8     | 0     | 20    | 0         | 20    |
| 10          | 13    | 7     | 10        | 10    | 0     | 20    | 0         | 20    |
| 11          | 16    | 4     | 11        | 9     | 0     | 20    | 0         | 20    |
| 12          | 16    | 4     | 13        | 7     | 0     | 20    | 0         | 20    |
| 13          | 15    | 5     | 13        | 7     | 0     | 20    | 0         | 20    |
| 14          | 13    | 7     | 12        | 8     | 0     | 20    | 0         | 20    |
| 15          | 16    | 4     | 13        | 7     | 0     | 20    | 0         | 20    |
| 16          | 15    | 5     | 12        | 8     | 0     | 20    | 0         | 20    |
| 17          | 12    | 8     | 10        | 10    | 0     | 20    | 0         | 20    |
| 18          | 18    | 2     | 14        | 6     | 0     | 20    | 0         | 20    |
| 19          | 15    | 5     | 12        | 8     | 0     | 20    | 0         | 20    |
| 20          | 16    | 4     | 10        | 10    | 0     | 20    | 0         | 20    |
| 21          | 17    | 3     | 11        | 9     | 0     | 20    | 0         | 20    |
| 22          | 15    | 5     | 12        | 8     | 0     | 20    | 0         | 20    |
| 23          | 13    | 7     | 10        | 10    | 0     | 20    | 0         | 20    |
| 24          | 12    | 8     | 9         | 11    | 0     | 20    | 0         | 20    |
| 25          | 11    | 9     | 8         | 12    | 0     | 20    | 0         | 20    |
| 26          | 14    | 6     | 10        | 10    | 0     | 20    | 0         | 20    |
| 27          | 18    | 2     | 16        | 4     | 0     | 20    | 0         | 20    |
| 28          | 14    | 6     | 7         | 13    | 0     | 20    | 0         | 20    |
| 29          | 16    | 4     | 12        | 8     | 0     | 20    | 0         | 20    |
| 30          | 13    | 7     | 3         | 17    | 0     | 20    | 0         | 20    |
| 31          | 15    | 5     | 12        | 8     | 0     | 20    | 0         | 20    |
| 32          | 15    | 5     | 7         | 13    | 0     | 20    | 0         | 20    |
| 33          | 13    | 7     | 10        | 10    | 0     | 20    | 0         | 20    |

(Continued)

| Patient No. | BCSCs |       | non-BCSCs |       | NBBCs |       | non-NBBCs |       |
|-------------|-------|-------|-----------|-------|-------|-------|-----------|-------|
|             | C228T | C228C | C228T     | C228C | C228T | C228C | C228T     | C228C |
| 34          | 17    | 3     | 11        | 9     | 0     | 20    | 0         | 20    |
| 35          | 15    | 5     | 12        | 8     | 0     | 20    | 0         | 20    |
| 36          | 16    | 4     | 10        | 10    | 0     | 20    | 0         | 20    |
| 37          | 12    | 8     | 5         | 15    | 0     | 20    | 0         | 20    |
| 38          | 16    | 4     | 11        | 9     | 0     | 20    | 0         | 20    |
| 39          | 11    | 9     | 10        | 10    | 0     | 20    | 0         | 20    |
| 40          | 17    | 3     | 12        | 8     | 0     | 20    | 0         | 20    |
| 41          | 14    | 6     | 10        | 10    | 0     | 20    | 0         | 20    |
| 42          | 17    | 3     | 11        | 9     | 0     | 20    | 0         | 20    |
| 43          | 12    | 8     | 9         | 11    | 0     | 20    | 0         | 20    |
| 44          | 13    | 7     | 5         | 15    | 0     | 20    | 0         | 20    |
| 45          | 18    | 2     | 13        | 7     | 0     | 20    | 0         | 20    |
| 46          | 14    | 6     | 9         | 11    | 0     | 20    | 0         | 20    |
| 47          | 17    | 3     | 12        | 8     | 0     | 20    | 0         | 20    |
| 48          | 12    | 8     | 9         | 11    | 0     | 20    | 0         | 20    |
| 49          | 15    | 5     | 12        | 8     | 0     | 20    | 0         | 20    |
| 50          | 16    | 4     | 11        | 9     | 0     | 20    | 0         | 20    |
| 51          | 12    | 8     | 7         | 13    | 0     | 20    | 0         | 20    |
| 52          | 17    | 3     | 15        | 5     | 0     | 20    | 0         | 20    |
| 53          | 13    | 7     | 12        | 8     | 0     | 20    | 0         | 20    |
| 54          | 14    | 6     | 11        | 9     | 0     | 20    | 0         | 20    |
| 55          | 12    | 8     | 10        | 10    | 0     | 20    | 0         | 20    |
| 56          | 13    | 7     | 9         | 11    | 0     | 20    | 0         | 20    |
| 57          | 11    | 9     | 8         | 12    | 0     | 20    | 0         | 20    |
| 58          | 14    | 6     | 9         | 11    | 0     | 20    | 0         | 20    |
| 59          | 15    | 5     | 10        | 10    | 0     | 20    | 0         | 20    |
| 60          | 14    | 6     | 7         | 13    | 0     | 20    | 0         | 20    |

**Supplementary Table S3. Tumor formation rates from xenografted mice of subpopulation cell types of bladder cancer samples**

| Patient No. | 100 cells tumor formation rate (%) |           |                  |       |           |                  |
|-------------|------------------------------------|-----------|------------------|-------|-----------|------------------|
|             | BCSCs                              | non-BCSCs | BCSCs<br>(T228C) | NBBCs | non-NBBCs | NBBCs<br>(C228T) |
| 1           | 30                                 | 0         | 0                | 0     | 0         | 20               |
| 3           | 20                                 | 0         | 0                | 0     | 0         | 10               |
| 7           | 40                                 | 0         | 0                | 0     | 0         | 30               |
| 12          | 20                                 | 0         | 0                | 0     | 0         | 20               |
| 15          | 20                                 | 0         | 0                | 0     | 0         | 0                |
| 22          | 50                                 | 0         | 0                | 0     | 0         | 20               |
| 27          | 30                                 | 0         | 0                | 0     | 0         | 10               |
| 33          | 30                                 | 0         | 0                | 0     | 0         | 20               |
| 36          | 40                                 | 0         | 0                | 0     | 0         | 30               |
| 42          | 10                                 | 0         | 0                | 0     | 0         | 0                |
| 45          | 30                                 | 0         | 0                | 0     | 0         | 10               |
| 56          | 20                                 | 0         | 0                | 0     | 0         | 10               |

**Supplementary Table S4. Relationship between the expression levels of TERT and clinicopathological features of human bladder cancers**

| Total              | Patients     | Expression of TERT |      |      | <i>p</i> |
|--------------------|--------------|--------------------|------|------|----------|
|                    |              | High               | Low  |      |          |
| Age                | Mean         | 60.3               | 65.2 | 57.9 | 0.352    |
| Sex                | Male         | 237                | 109  | 128  | 0.428    |
|                    | Female       | 82                 | 37   | 45   |          |
| Tumor stage        | Ta,Tis,T1    | 186                | 69   | 117  | <0.001   |
|                    | T2           | 59                 | 38   | 21   |          |
|                    | T3           | 45                 | 32   | 13   |          |
|                    | T4           | 29                 | 23   | 6    |          |
| Grade              | G1 or 2      | 142                | 54   | 88   | <0.001   |
|                    | G3           | 177                | 125  | 52   |          |
| Configuration      | Papillary    | 46                 | 24   | 22   | 0.708    |
|                    | Nonpapillary | 273                | 153  | 120  |          |
| Number of tumors   | Solitary     | 252                | 136  | 116  | 0.082    |
|                    | Multiple     | 67                 | 24   | 43   |          |
| Lymphatic invasion | Negative     | 174                | 45   | 129  | <0.001   |
|                    | Positive     | 127                | 85   | 42   |          |
|                    | Unknown      | 18                 | 11   | 7    |          |
